# Supplementary material for: Dual drug-loaded halloysite hybrid-based glycocluster for sustained release of hydrophobic molecules
Source: Royal Society of Chemistry journal article supplement (doi:10.1039/c6ra14657k), 2016-01-01
Supplement: c6ra14657k1.pdf [file c6ra14657k1.pdf]

## Supporting information

### Dual drug-loaded halloysite hybrid-based glycocluster for sustained release of hydrophobic molecules

Marina Massaro, Serena Riela, Concetta Baiamonte, José L. Jiménez-Blanco, Carla Giordano, Paolo Lo Meo, Stefana Milioto, Renato Noto, Filippo Parisi, Giuseppe Pizzolanti, and Giuseppe Lazzara.

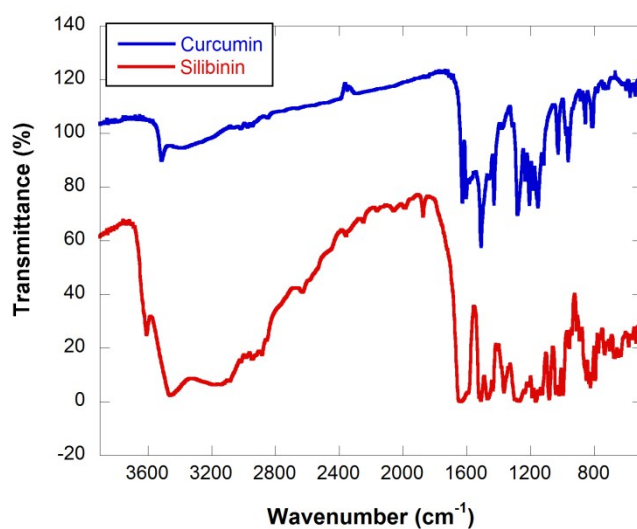

Figure S.1. FTIR spectra of curcumin and silibinin.

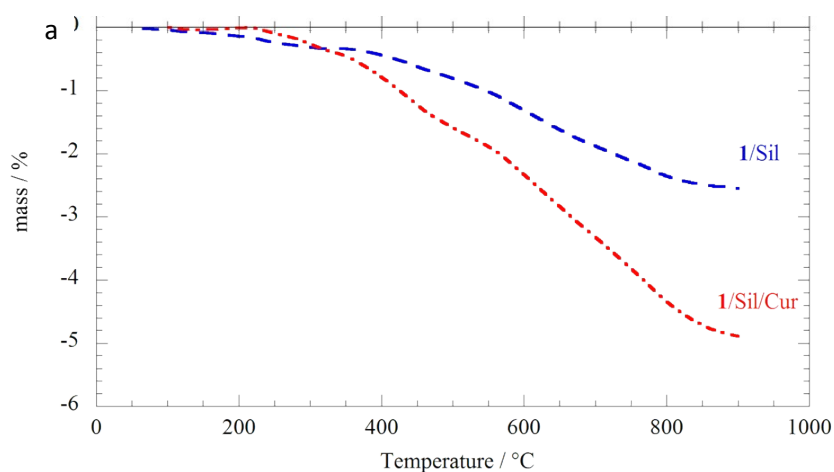

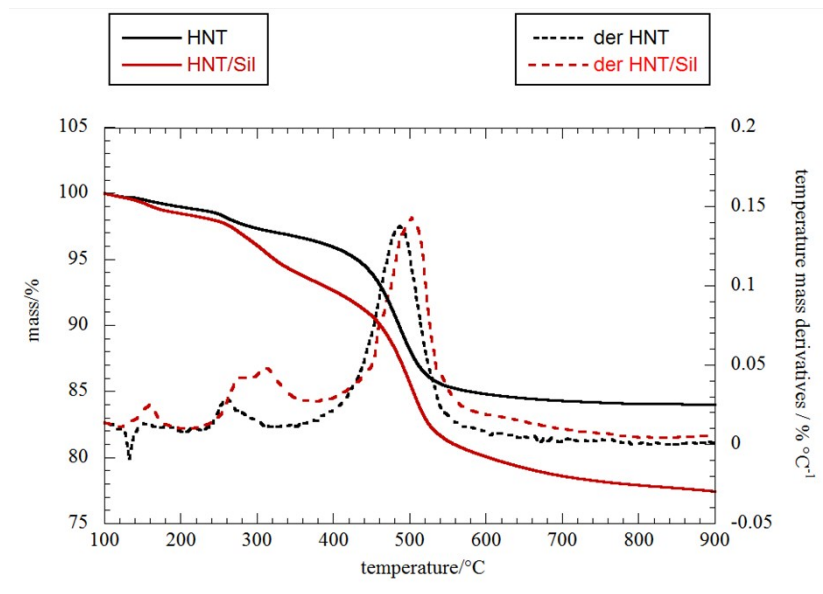

**Figure S.2.** a) Thermoanalytical curves after subtraction of the one of compound 1; b) thermoanalytical curves for p-HNT and p-HNT/sil complex.

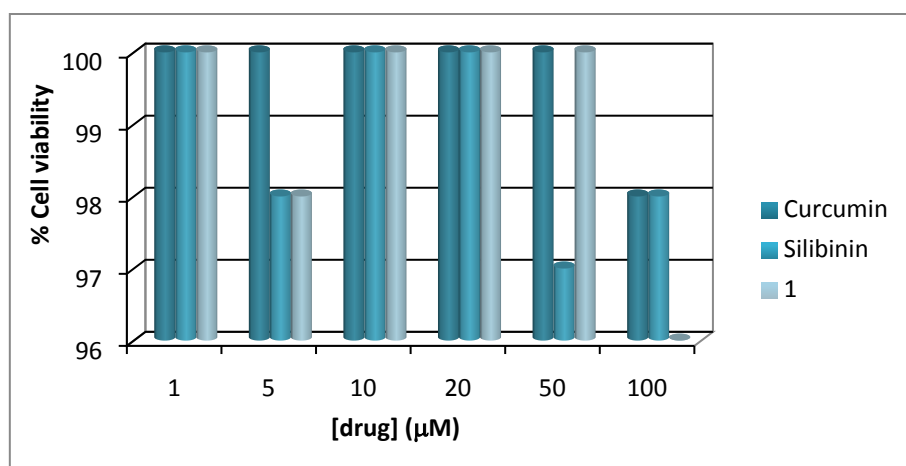

**Figure S.3.** MTS test for cell viability of 8505c cells cultured for 72 h in presence of **1**, curcumin and silibinin.
